# Supplementary material
Source: PubMed Central journal article supplement (PMC8126992)
Supplement: jamacardiol-e211157-s001.pdf [file jamacardiol-e211157-s001.pdf]

## Supplemental Online Content

Nissen SE, Lincoff AM, Wolski K, et al. Association between achieved  $\omega$ -3 fatty acid levels and major adverse cardiovascular outcomes in patients with high cardiovascular risk: a secondary analysis of the STRENGTH Trial. *JAMA Cardiol*. Published online May 16, 2021. doi:10.1001/jamacardio.2021.1157

**eTable 1.** Baseline characteristics for patients with and without omega-3 fatty acid levels available

**eTable 2.** Absolute changes biochemical measurements from baseline to 12 months by tertile of on-treatment plasma EPA level

**eTable 3.** Relationship Between Tertiles of Achieved Red Blood Cell EPA and DHA Levels and Cardiovascular Events

**eTable 4.** Relationship Between Tertiles of Change in Red Blood Cell EPA and DHA Levels and Cardiovascular Events

**eTable 5.** Relationship Between Tertiles of Change in Plasma EPA and DHA Levels and Cardiovascular Events in the Primary Prevention Population

**eTable 6.** Relationship Between Tertiles of Achieved Plasma EPA and DHA Levels and Cardiovascular Events in the Secondary Prevention Population

**eFigure 1.** Relationship between Plasma EPA and DHA Levels 12 Months after Randomization

**eFigure 2.** Relationship between Change in Plasma EPA and DHA Levels 12 Months after Randomization

**eFigure 3.** Time to Event First Incidence of Any Component of the Primary Composite Endpoint for Patients in the Top Tertile of Change in EPA Level

**eFigure 4.** Time to Event First Incidence of Any Component of the Primary Composite Endpoint for Patients in the Top Tertile of Change in DHA Level

This supplemental material has been provided by the authors to give readers additional information about their work.

**eTable 1. Baseline characteristics for patients with and without omega-3 fatty acid levels available**

|                                                   | Patients with omega 3 fatty acid data<br>N=10382 | Patients without omega 3 fatty acid data<br>N=2696 |
|---------------------------------------------------|--------------------------------------------------|----------------------------------------------------|
| Age, mean (SD),– (years)                          | 62.5 ± 8.9                                       | 62.4 ± 9.5                                         |
| Female sex – no. (%)                              | 3588 (34.6)                                      | 980 (36.4)                                         |
| Body mass index, mean (SD) – (kg/m <sup>2</sup> ) | 32.5 ± 5.6                                       | 31.1 ± 5.8                                         |
| Ethnicity – no (%)                                |                                                  |                                                    |
| White                                             | 9025 (86.9)                                      | 1698 (63.0)                                        |
| Black                                             | 277 (2.7)                                        | 69 (2.6)                                           |
| Asian                                             | 564 (5.4)                                        | 791 (29.3)                                         |
| Other                                             | 340 (3.3)                                        | 53 (2.0)                                           |
| Established CVD at baseline no. (%)               |                                                  |                                                    |
| Coronary disease – no (%)                         | 4629 (44.6)                                      | 1406 (52.2)                                        |
| Cerebrovascular disease – no (%)                  | 780 (7.5)                                        | 268 (9.9)                                          |
| Peripheral vascular disease – no (%)              | 385 (3.7)                                        | 99 (3.7)                                           |
| Aortic disease – no (%)                           | 380 (3.7)                                        | 78 (2.9)                                           |
| Diabetes mellitus at baseline - no (%)            | 3724 (35.9)                                      | 806 (29.9)                                         |
| History of hypertension                           | 9141 (88.1)                                      | 2279 (84.5)                                        |
| eGFR, mean (SD) (mL/min/1.73m <sup>2</sup> )      | 77.2 ± 19.3                                      | 78.1 ± 20.4                                        |
| Medication use                                    |                                                  |                                                    |
| High-intensity statin – no (%)                    | 5485 (52.8)                                      | 1043 (38.7)                                        |
| Other statin – no (%)                             | 4897 (47.2)                                      | 1653 (61.3)                                        |
| Antiplatelet agents – no (%)                      | 7343 (70.7)                                      | 1980 (73.4)                                        |
| RAAS blockers – no (%)                            | 8540 (82.3)                                      | 2085 (77.3)                                        |
| Beta-blockers – no (%)                            | 6897 (66.4)                                      | 1798 (66.7)                                        |
| Laboratory data                                   |                                                  |                                                    |
| Total cholesterol (mg/dL)                         | 162 (139, 190)                                   | 154 (135, 180)                                     |
| LDL cholesterol (mg/dL)                           | 76 (57, 101)                                     | 70 (52, 92)                                        |
| HDL cholesterol (mg/dL)                           | 36 (31, 40)                                      | 35 (31, 40)                                        |
| Triglycerides (mg/dL)                             | 240 (192, 309)                                   | 238 (189, 305)                                     |
| Non-HDL cholesterol (mg/dL)                       | 126 (105, 154)                                   | 119 (100, 144)                                     |

|                              |             |             |
|------------------------------|-------------|-------------|
| Apolipoprotein B (mg/dL)     | 57 (44, 73) | 53 (41, 69) |
| Apolipoprotein C-III (mg/dL) | 17 (14, 21) | 17 (14, 21) |

CVD=cardiovascular disease. eGFR=estimated glomerular filtration rate. RASS = renin aldosterone angiotensin system. LDL=Low density lipoprotein cholesterol. HDL=high density lipoprotein cholesterol.

Conversion factors for System International (SI) units. For HDL and LDL, multiply by 0.0259, for triglycerides, multiply by 0.0113

**eTable 2. Absolute changes biochemical measurements from baseline to 12 months by tertile of on-treatment plasma EPA level**

|                              | All Patients<br>N=10382 | Corn Oil<br>N=5207 | All EPA<br>N=5157 | Plasma EPA<br>Tertile 1<br>N=1733 | Plasma EPA<br>Tertile 2<br>N=1727 | Plasma EPA<br>Tertile 3<br>N=1715 |
|------------------------------|-------------------------|--------------------|-------------------|-----------------------------------|-----------------------------------|-----------------------------------|
| Laboratory data              |                         |                    |                   |                                   |                                   |                                   |
| Total cholesterol (mg/dL)    | -3 (-22, 16)            | 0 (-19, 19)        | -6 (-25, 13)      | -5 (-29, 17)                      | -8 (-26, 7)                       | -4 (-21, 15)                      |
| LDL cholesterol (mg/dL)      | 0 (-15, 15)             | -1 (-16, 14)       | 0 (-15, 16)       | -1 (-21, 17)                      | -1 (-15, 12)                      | 3 (-10, 19)                       |
| HDL cholesterol (mg/dL)      | 1 (-2, 5)               | 1 (-2, 5)          | 2 (-2, 5)         | 2 (-2, 6)                         | 2 (-1, 5)                         | 1 (-2, 5)                         |
| Triglycerides (mg/dL)        | -24 (-88, 37)           | -2 (-64, 59)       | -44 (-105, 12)    | -31 (-97, 29)                     | -49 (-106, -1)                    | -47 (-108, 8)                     |
| Non-HDL cholesterol (mg/dL)  | -5 (-24, 14)            | -2 (-20, 16)       | -8 (-27, 11)      | -7 (-31, 14)                      | -10 (-28, 5)                      | -6 (-23, 13)                      |
| Apolipoprotein B (mg/dL)     | -1.1 (-16, 13)          | -1 (-15, 12)       | -1.2 (-16, 13)    | -2.9 (-18, 12)                    | -2.1 (-16, 11)                    | 1.3 (-13, 16)                     |
| Apolipoprotein C-III (mg/dL) | 0 (-4, 4)               | 1 (-3, 5)          | -1 (-5, 2)        | -1 (-4, 3)                        | -2 (-5, 1)                        | -1 (-5, 2)                        |
| hsCRP (mg/L)*                | -0.2 (-1.4, 0.6)        | -0.1 (-1.2, 0.8)   | -0.3 (-1.7, 0.4)  | -0.5 (-1.8, 0.4)                  | -0.3 (-1.7, 0.6)                  | -0.2 (-1.6, 0.4)                  |
| Plasma EPA (ug/mL)           | 8 (-3.7, 66)            | -2 (-8.8, 4.2)     | 64 (21, 102)      | 8 (-2, 25)                        | 67 (53, 81)                       | 121 (101, 148)                    |
| RBC EPA (% of total)         | 0.2 (-0.1, 2.1)         | -0.04 (-0.2, 0.05) | 2.1 (0.8, 3.2)    | 0.3 (0.02, 1.2)                   | 2.3 (1.7, 2.9)                    | 3.4 (2.7, 4.1)                    |
| Plasma DHA (ug/mL)           | 6 (-10, 30)             | -4 (-16, 8)        | 24 (4, 47)        | 5.5 (-10, 19)                     | 29 (13, 43)                       | 48 (24, 69)                       |
| RBC DHA (% of total)         | 0.3 (-0.3, 1.4)         | -0.2 (-0.6, 0.3)   | 1.2 (0.3, 2.2)    | 0.6 (-0.1, 1.4)                   | 1.6 (0.8, 2.4)                    | 1.6 (0.6, 2.6)                    |

LDL=Low density lipoprotein cholesterol. HDL=high density lipoprotein cholesterol. hsCRP=high sensitivity C-reactive protein. EPA=eicosapentaenoic acid. RBC=Red blood cell. DHA=docosahexaenoic acid \*All follow-up measures were at 12 months, except for hsCRP, which was measured at 60 months (n = 1499 in corn oil placebo and n = 1467 in omega-3 carboxylic acid).

Conversion factors for System International (SI) units. For HDL and LDL, multiply by 0.0259, for triglycerides, multiply by 0.0113

**eTable 3. Relationship Between Tertiles of Achieved Red Blood Cell EPA and DHA Levels and Cardiovascular Events\***

| <b>Achieved Red Blood Cell EPA</b>   |                         |                         |                       |         |
|--------------------------------------|-------------------------|-------------------------|-----------------------|---------|
|                                      | Red Blood Cell EPA (%)^ | N with events (percent) | †Adjusted HR (95% CI) | P value |
| Corn oil                             | NA                      | 573/5185 (11.05%)       | reference             | NA      |
| Achieved Red Blood Cell EPA Tertiles | <2.02                   | 182/1719 (10.59)        | 1.08 (0.91, 1.28)     | 0.38    |
|                                      | 2.03-3.56               | 203/1717 (11.82)        | 1.08 (0.92, 1.27)     | 0.36    |
|                                      | 3.57-8.31               | 184/1713 (10.74)        | 0.90 (0.76, 1.07)     | 0.22    |
| <b>Achieved Red Blood Cell DHA</b>   |                         |                         |                       |         |
|                                      | Red Blood Cell DHA (%)^ | N with events (percent) | †Adjusted HR (95% CI) | P value |
| Corn Oil                             | NA                      | 573/5185 (11.05)        | reference             | NA      |
| Achieved Red Blood Cell DHA Tertiles | <6.05                   | 198/1713 (11.56)        | 1.16 (0.94, 1.43)     | 0.17    |
|                                      | 6.06-6.99               | 184/1712 (10.75)        | 1.16 (0.95, 1.41)     | 0.14    |
|                                      | 7-11.45                 | 187/1724 (10.85)        | 0.95 (0.76, 1.17)     | 0.61    |

\*Cardiovascular Death, myocardial infarction, stroke, Hospitalization for unstable angina, revascularization

†Adjusted for baseline fatty acid levels, region, cardiovascular disease, age, gender, diabetes, creatinine, non-HDL cholesterol, high sensitivity C-reactive protein, antiplatelets agents,  $\beta$  Blockers, renin angiotensin inhibitors

^Percent of total Omega-3 fatty acids

**eTable 4. Relationship Between Tertiles of Change in Red Blood Cell EPA and DHA Levels and Cardiovascular Events\***

| <b>Change in Red Blood Cell EPA</b>      |                                     |                         |                       |         |
|------------------------------------------|-------------------------------------|-------------------------|-----------------------|---------|
|                                          | Red Blood Cell EPA (%) <sup>^</sup> | N with events (percent) | †Adjusted HR (95% CI) | P value |
| Corn oil                                 | NA                                  | 574/5207 (11.02)        | reference             | NA      |
| Tertiles of Change in Red Blood Cell EPA | < 1.33                              | 181/1714 (10.56)        | 1.07 (0.90, 1.27)     | 0.44    |
|                                          | 1.34-2.83                           | 203/1708 (11.89)        | 1.09 (0.92, 1.27)     | 0.32    |
|                                          | 2.83-7.24                           | 184/1715 (10.73)        | 0.92 (0.78, 1.09)     | 0.32    |
| <b>Change in Red Blood Cell DHA</b>      |                                     |                         |                       |         |
|                                          | Red Blood Cell DHA (%) <sup>^</sup> | N with events (percent) | †Adjusted HR (95% CI) | P value |
| Corn Oil                                 | NA                                  | 573/5185 (11.05)        | reference             | NA      |
| Tertiles of Change in Red Blood Cell DHA | < 0.63                              | 188/1718 (10.94)        | 1.07 (0.90, 1.27)     | 0.48    |
|                                          | 0.63-1.88                           | 189/1713 (11.03)        | 1.03 (0.87, 1.21)     | 0.76    |
|                                          | 1.89-8.6                            | 192/1718 (11.18)        | 0.96 (0.81, 1.14)     | 0.67    |

\*Cardiovascular Death, myocardial infarction, stroke, Hospitalization for unstable angina, revascularization

†Adjusted for baseline fatty acid levels, region, cardiovascular disease, age, gender, diabetes, creatinine, non-HDL cholesterol, high sensitivity C-reactive protein, antiplatelets agents, β Blockers, renin angiotensin inhibitors

EPA=eicosapentaenoic acid. DHA=docosahexaenoic acid.

<sup>^</sup>Percent of total Omega-3 fatty acids

**eTable 5. Relationship Between Tertiles of Change in Plasma EPA and DHA Levels and Cardiovascular Events\* in the Primary Prevention Population\***

| <b>Achieved Plasma EPA</b>        |                    |                         |                      |                  |
|-----------------------------------|--------------------|-------------------------|----------------------|------------------|
|                                   | Plasma EPA (µg/mL) | N with events (percent) | Adjusted HR (95% CI) | Adjusted P value |
| Corn oil                          | NA                 | 139/2367 (5.87)         | reference            | NA               |
| Achieved EPA Tertiles             | 2.2-62.4           | 47/821 (5.72)           | 1.11 (0.79, 1.55)    | 0.55             |
|                                   | 62.5-116.3         | 60/791 (7.59)           | 1.30 (0.96, 1.77)    | 0.09             |
|                                   | 116.4-474.9        | 54/785 (6.88)           | 1.21 (0.88, 1.67)    | 0.23             |
| <b>Achieved Plasma DHA Levels</b> |                    |                         |                      |                  |
|                                   | Plasma EPA (µg/mL) | N with events (percent) | Adjusted HR (95% CI) | Adjusted P value |
| Corn Oil                          | NA                 | 139/2367 (5.87)         | reference            | NA               |
| Achieved DHA Tertiles             | 16-78.2            | 50/795 (6.29)           | 1.21 (0.87, 1.67)    | 0.26             |
|                                   | 78.3-105.1         | 54/804 (6.72)           | 1.15 (0.84, 1.58)    | 0.38             |
|                                   | 105.2-409.7        | 57/798 (7.14)           | 1.26 (0.92, 1.72)    | 0.15             |

\*Cardiovascular Death, myocardial infarction, stroke, Hospitalization for unstable angina, revascularization

†Adjusted for baseline fatty acid levels, region, cardiovascular disease, age, gender, diabetes, creatinine, non-HDL cholesterol, high sensitivity C-reactive protein, antiplatelets agents, β Blockers, renin angiotensin inhibitors

EPA=eicosapentaenoic acid. DHA=docosahexaenoic acid.

**eTable 6. Relationship Between Tertiles of Achieved Plasma EPA and DHA Levels and Cardiovascular Events\* in the Secondary Prevention Population**

| <b>Achieved Plasma EPA</b>        |                    |                         |                       |                  |
|-----------------------------------|--------------------|-------------------------|-----------------------|------------------|
|                                   | Plasma EPA (µg/mL) | N with events (percent) | †Adjusted HR (95% CI) | Adjusted P value |
| Corn oil                          | NA                 | 435/2840 (15.32)        | reference             | NA               |
| Achieved EPA Tertiles             | 2.2-62.4           | 126/912 (13.82)         | 0.97 (0.79, 1.18)     | 0.74             |
|                                   | 62.5-116.3         | 148/936 (15.81)         | 1.03 (0.85, 1.24)     | 0.76             |
|                                   | 116.4-474.9        | 140/930 (15.05)         | 0.91 (0.75, 1.11)     | 0.36             |
| <b>Achieved Plasma DHA Levels</b> |                    |                         |                       |                  |
|                                   | Plasma EPA (µg/mL) | N with events (percent) | †Adjusted HR (95% CI) | Adjusted P value |
| Corn Oil                          | NA                 | 435/2840 (15.32)        | reference             | NA               |
| Achieved DHA Tertiles             | 16-78.2            | 138/940 (14.68)         | 0.98 (0.81, 1.19)     | 0.87             |
|                                   | 78.3-105.1         | 137/918 (14.92)         | 0.99 (0.81, 1.19)     | 0.88             |
|                                   | 105.2-409.7        | 139/920 (15.11)         | 0.95 (0.78, 1.15)     | 0.59             |

\*Cardiovascular Death, myocardial infarction, stroke, Hospitalization for unstable angina, revascularization

†Adjusted for baseline fatty acid levels, region, cardiovascular disease, age, gender, diabetes, creatinine, non-HDL cholesterol, high sensitivity C-reactive protein, antiplatelets agents, β Blockers, renin angiotensin inhibitors

EPA=eicosapentaenoic acid. DHA=docosahexaenoic acid.



eFigure 1. Relationship between Plasma EPA and DHA Levels 12 Months after Randomization

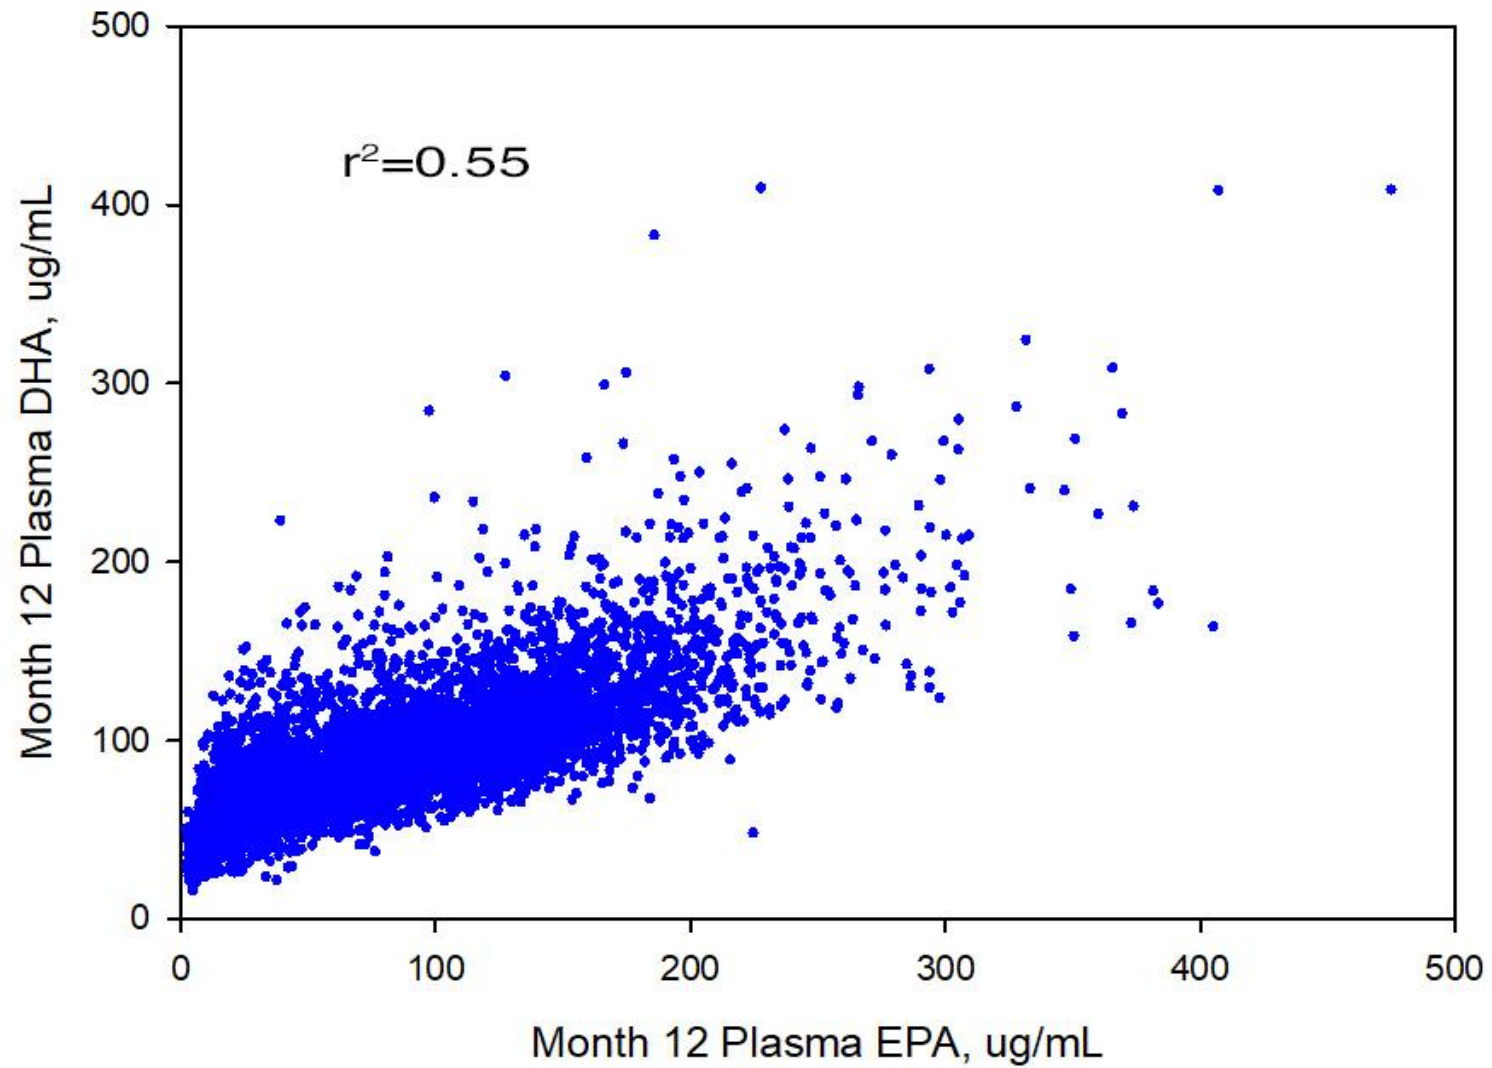

EPA=eicosapentaenoic acid. DHA=docosahexaenoic acid

eFigure 2. Relationship between Change in Plasma EPA and DHA Levels 12 Months after Randomization

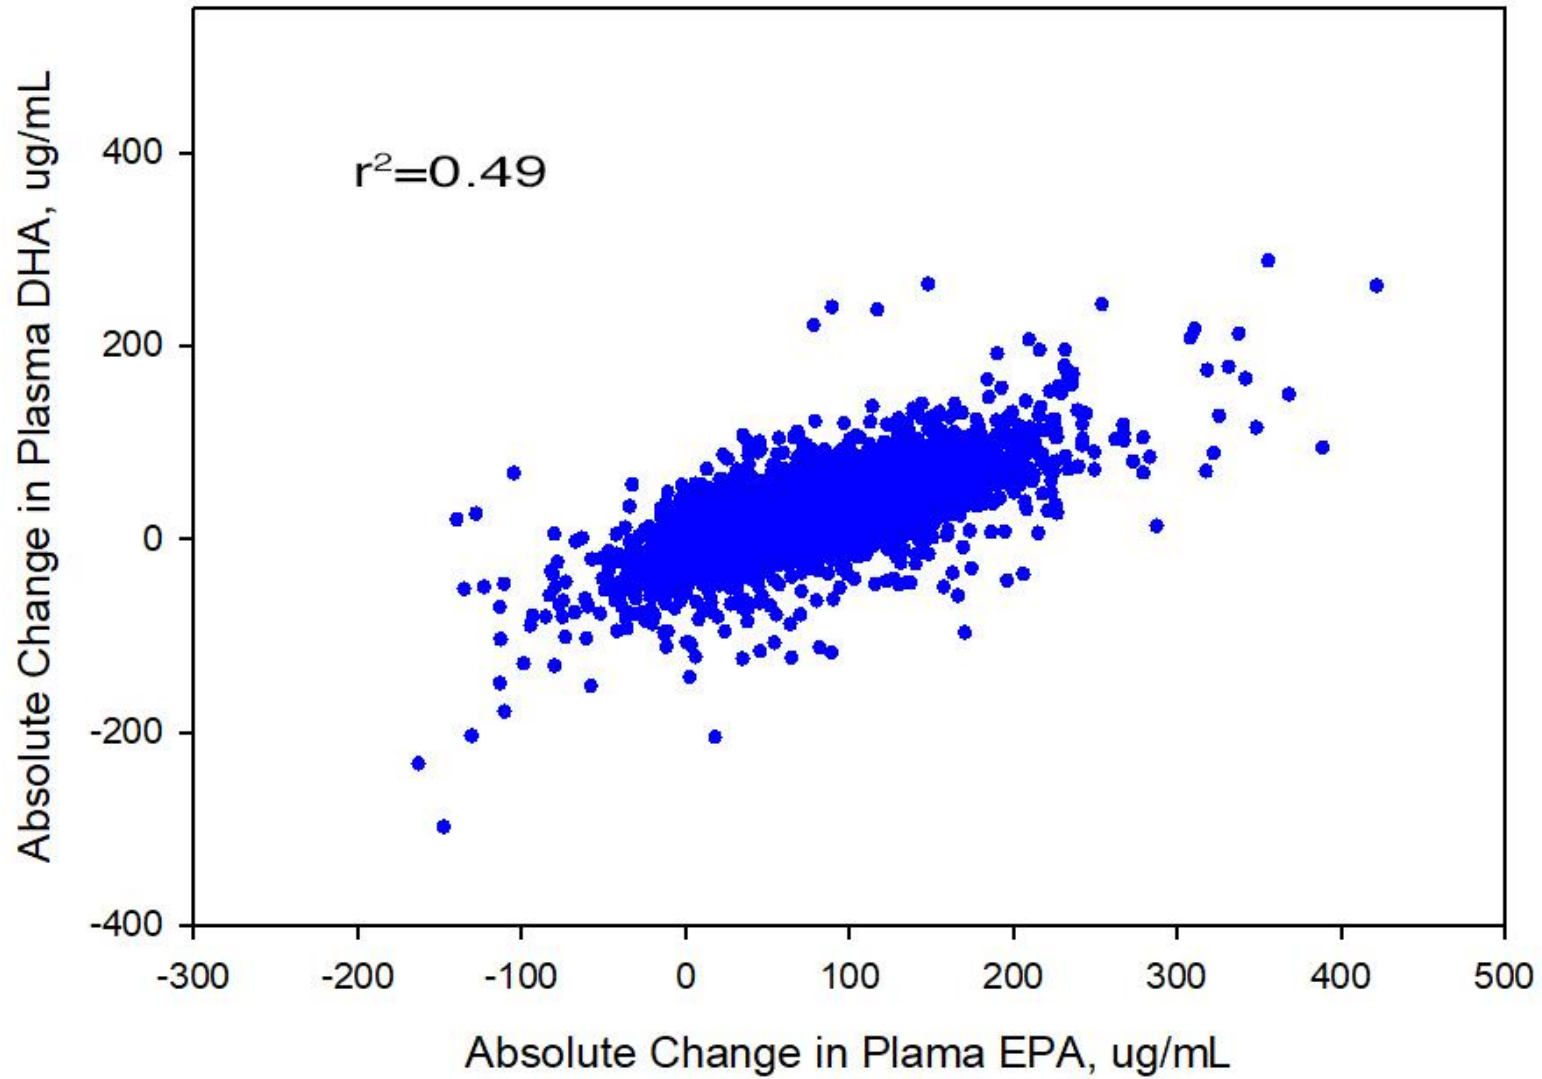

EPA=eicosapentaenoic acid. DHA=docosahexaenoic acid

**eFigure 3. Time to Event First Incidence of Any Component of the Primary Composite Endpoint for Patients in the Top Tertile of Change in EPA Level\***

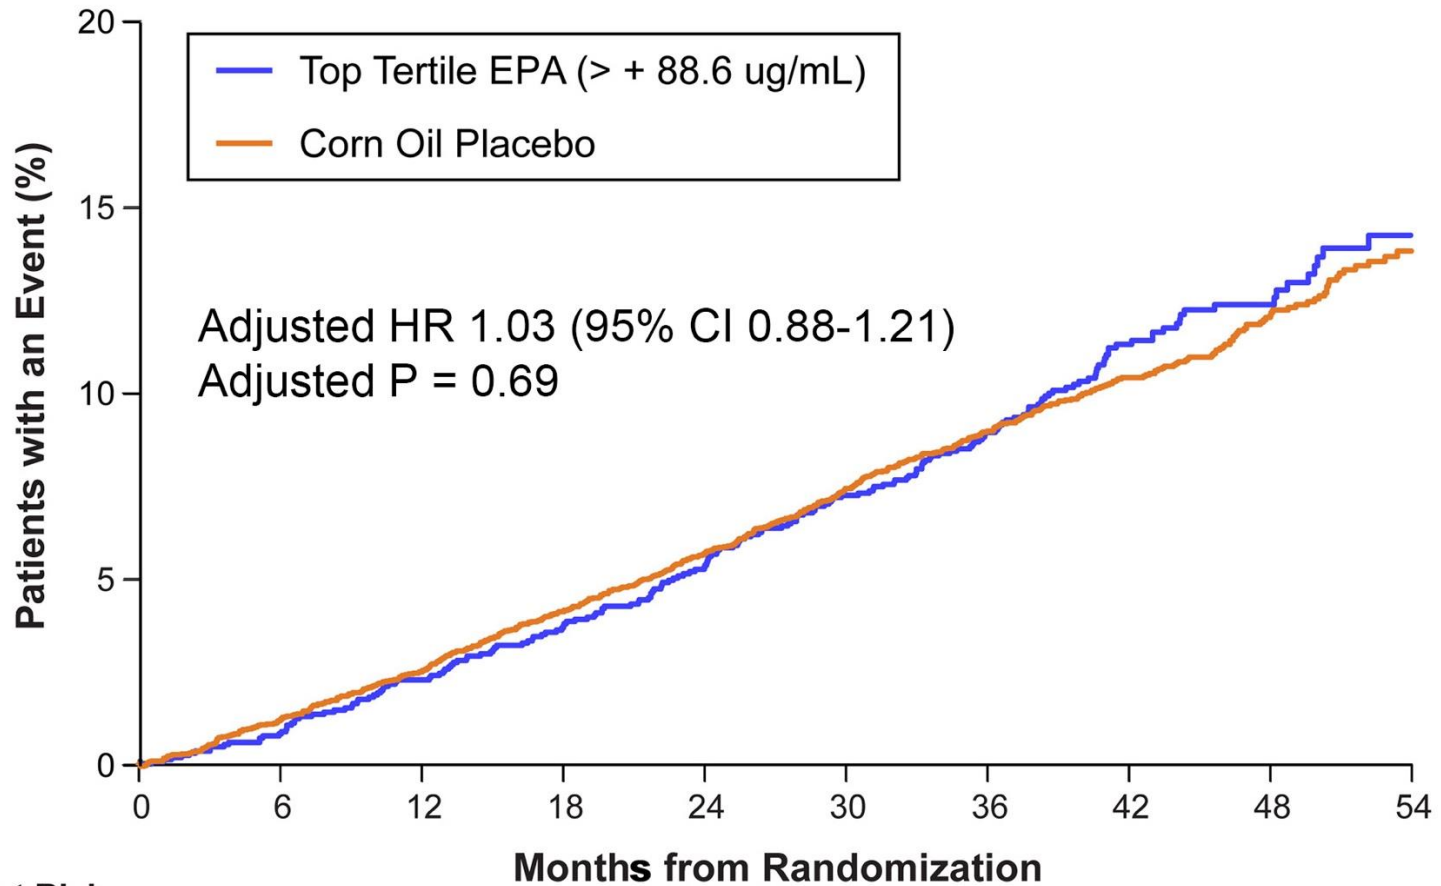

**Number at Risk**

|                 |      |      |      |      |      |     |
|-----------------|------|------|------|------|------|-----|
| Corn Oil        | 5207 | 5063 | 4839 | 4093 | 1314 | 476 |
| Top Tertile EPA | 1724 | 1681 | 1618 | 1390 | 455  | 160 |

\*The primary composite end point consisted of cardiovascular death, nonfatal myocardial infarction, nonfatal stroke, coronary revascularization, and hospitalization for unstable angina.

Adjusted for baseline fatty acid levels, region, cardiovascular disease, age, gender, diabetes, creatinine, non-HDL cholesterol, high sensitivity C-reactive protein, antiplatelets agents,  $\beta$  Blockers, renin angiotensin inhibitors

EPA=eicosapentaenoic acid.

**eFigure 4. Time to Event First Incidence of Any Component of the Primary Composite Endpoint for Patients in the Top Tertile of Change in DHA Level**

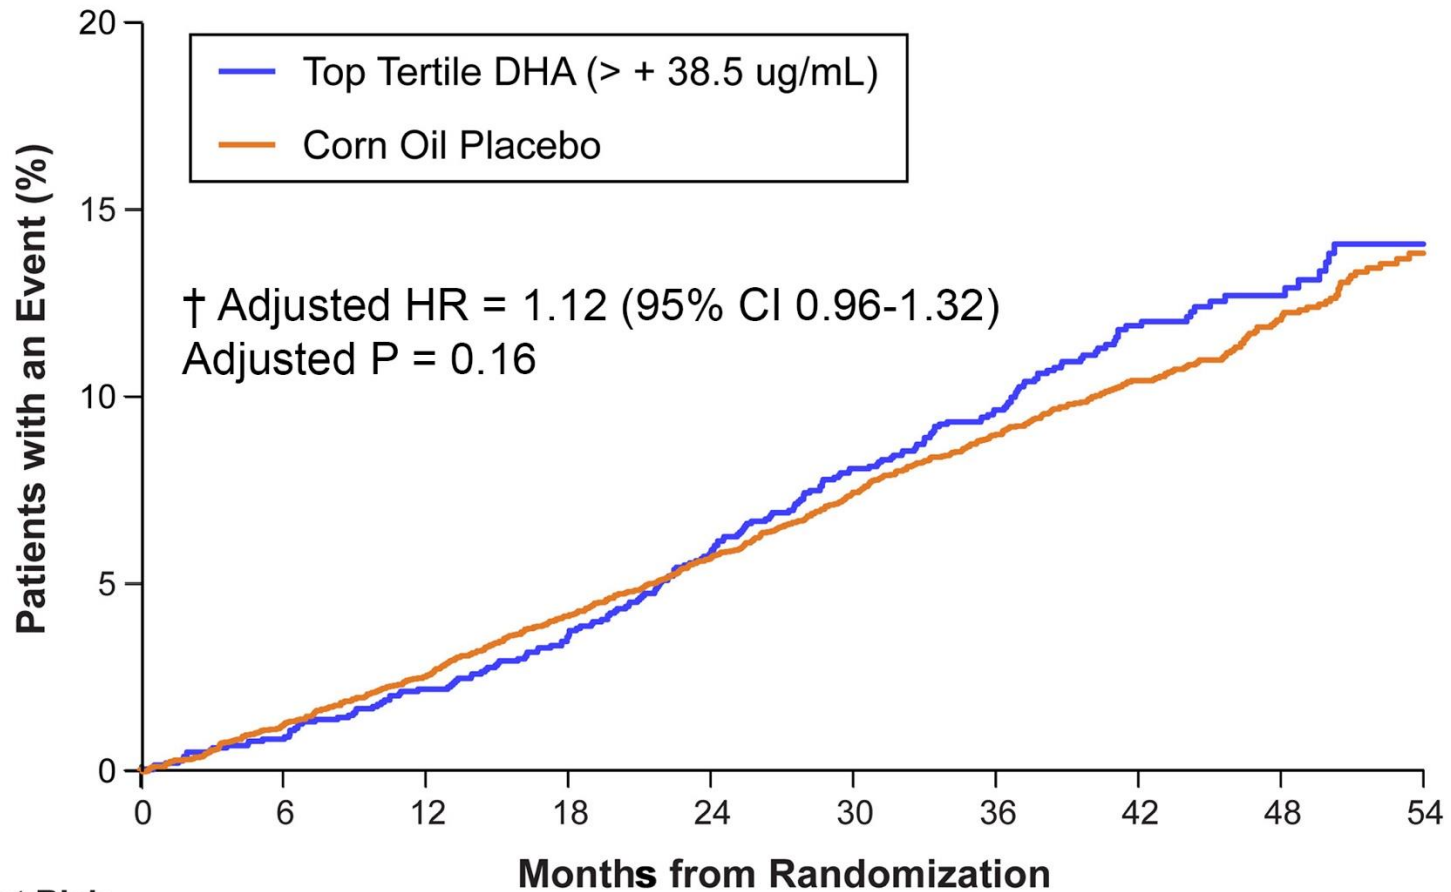

**Number at Risk**

|                 | 0    | 6    | 12   | 18   | 24   | 30  | 36 | 42 | 48 | 54 |
|-----------------|------|------|------|------|------|-----|----|----|----|----|
| Corn Oil        | 5207 | 5063 | 4839 | 4093 | 1314 | 476 |    |    |    |    |
| Top Tertile DHA | 1724 | 1685 | 1609 | 1358 | 427  | 181 |    |    |    |    |

The primary composite end point consisted of cardiovascular death, nonfatal myocardial infarction, nonfatal stroke, coronary revascularization, and hospitalization for unstable angina.

†Adjusted for baseline fatty acid levels, region, cardiovascular disease, age, gender, diabetes, creatinine, non-HDL cholesterol, high sensitivity C-reactive protein, antiplatelets agents,  $\beta$  Blockers, renin angiotensin inhibitors

DHA=docosahexaenoic acid
